# Supplementary material
Source: publisher site journal article supplement (https://www.dovepress.com/article/378298)
Supplement: Supplementary file 1 [file get_supplementary_file.php]

Appendix (1)

**Capsulorhexis simulation model survey**

| 1 | How much does this model simulate real-life CC Capsulorhexis? | | | | |
| --- | --- | --- | --- | --- | --- |
| ☐  Unrelated | ☐  Poor | ☐  acceptable | ☐  favorable | ☐  excellent |  |
| 2 | How much is this model is of educational value to novice trainees? | | | | |
| ☐  Unacceptable | ☐  Poor | ☐  Acceptable | ☐  favorable | ☐  Excellent |  |
| 3 | Which capsulotomy procedures/tools this model can simulate?  (Multiple choice; more than an answer can be chosen) | | | | |
| ☐  Cystotome | ☐  Utrata | ☐  Akahoshi | ☐  Inmura | ☐  20-G microsurgical |  |
| 4 | **Can this simulation model be used for training on management of runaway capsulorhexis leading edge?** | | | | |
| ☐  Unacceptable | ☐  Poor | ☐  Acceptable | ☐  Favorable | ☐  Excellent |  |
| 5 | **Can this simulation model be used for training on Expansion of a small CCC?** | | | | |
| ☐  Unacceptable | ☐  Poor | ☐  Acceptable | ☐  Favorable | ☐  Excellent |  |
| 6 | **Have you used simulation models of CCC before?** | | | | |
|  | ☐  Yes, | ☐  No |  |  |  |
| 7 | 7. If yes, you have used a CCC simulation model before; What type/s of simulation model have you used? (Multiple choice; more than an answer can be chosen) | | | | |
| ☐  Virtual reality | ☐  Animal eyes wet lab | ☐  Synthetic eye dry lab | ☐  Vegetable/ fruit based like: tomato or grapes skin | ☐  Other (Specify): |  |
| 8 | How does this current simulation model compare to the model you used in terms of simulation/educational value? (Likert scale rate) | | | | |
| ☐  Unacceptable | ☐  Poor | ☐  Acceptable | ☐  Slightly superior | ☐  Superior |  |
